# Supplementary material for: Lightweight flexible polyurethane/reduced ultralarge graphene oxide composite foams for electromagnetic interference shielding
Source: Royal Society of Chemistry journal article supplement (doi:10.1039/c5ra25374h), 2016-01-01
Supplement: c5ra25374h1.pdf [file c5ra25374h1.pdf]

## Supporting Information

### **Lightweight flexible polyurethane/reduced ultralarge graphene oxide composite foams for electromagnetic interference shielding**

Jaber Nasrollah Gavgani<sup>1</sup>, Hossein Adelnia<sup>2</sup>, Davood Zaarei\*<sup>3</sup>, Mohsen Moazzami Gudarzi<sup>14</sup>

<sup>1</sup>Department of Polymer Engineering and Color Technology, Amirkabir University of Technology, P.O. Box 15875-4413, Tehran, Iran

<sup>2</sup>Young Researchers and Elite Club, Shahreza Branch, Islamic Azad University, P.O. Box: 86145-311, Shahreza, Iran

<sup>3</sup>Department of Polymer Engineering, Technical Faculty, South Tehran Branch, Islamic Azad University, P.O. Box 11365-4435, Tehran, Iran

<sup>4</sup>Department of Inorganic and Analytical Chemistry, School of Chemistry and Biochemistry, University of Geneva, Geneva, Switzerland

---

<sup>1</sup>Corresponding authors: Email: [d\\_zarei@azad.ac.ir](mailto:d_zarei@azad.ac.ir); Tel: 982188830326  
Email: [mohsen.moazzami@unige.ch](mailto:mohsen.moazzami@unige.ch)

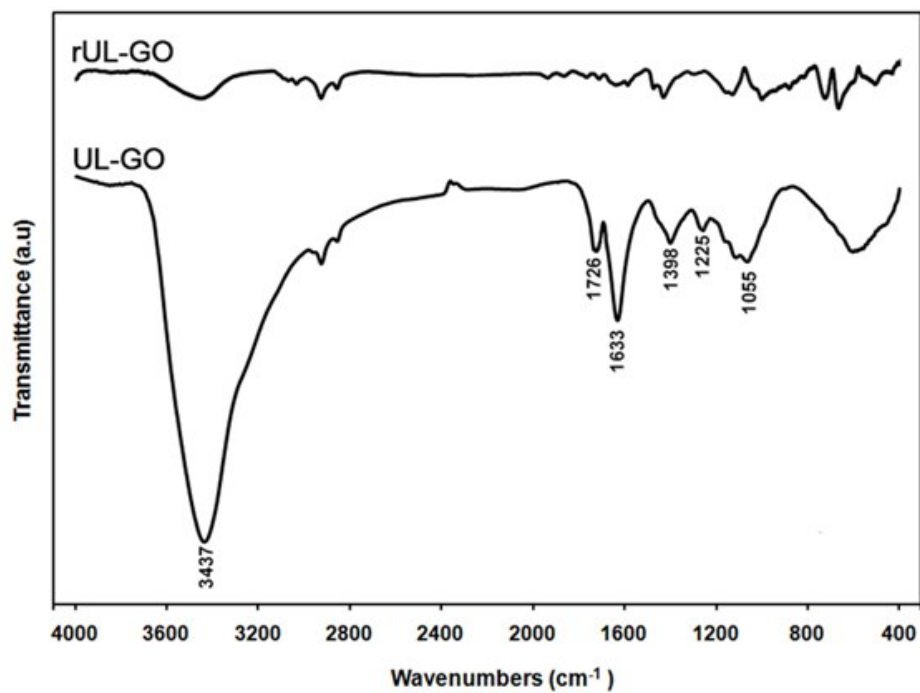

Fig. S1 FTIR spectra of UL-GO and rUL-GO.

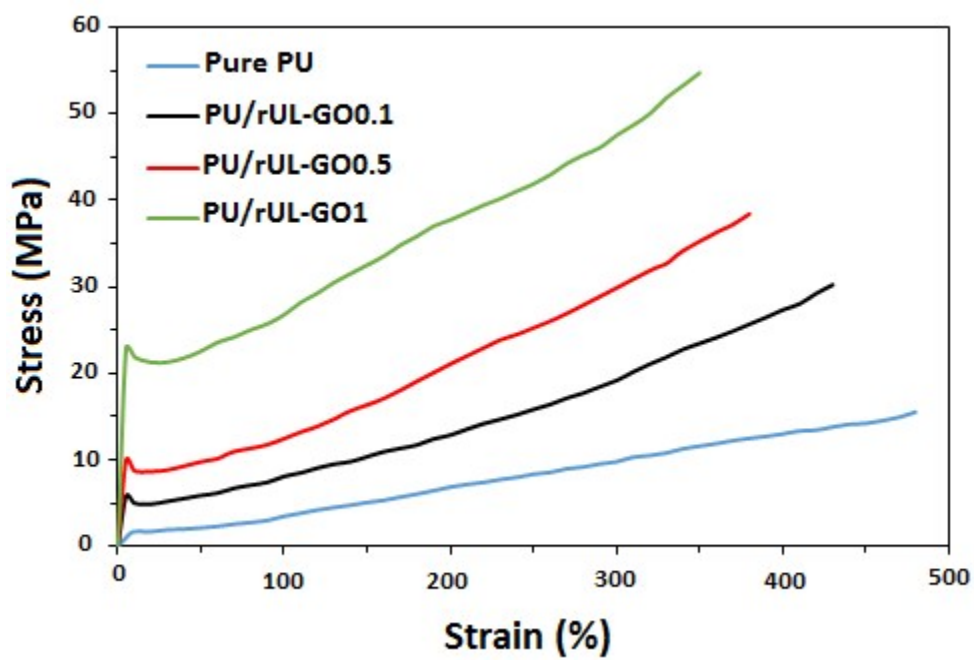

Fig. S2 Stress-strain curves of pure PU and PU/rUL-GO composite foams.
